# Supplementary material for: Hemodialysis patients’ satisfaction with dialysis care: a cross-sectional prospective study conducted in a non-profitable care facility, Minia Egypt
Source: Springer Nature journal article supplement (doi:10.1186/s12882-022-03010-3), 2022-12-06
Supplement: MOESM1 [file 23795136]

|                      |                                  |                                      |                               |                                           |                                      |                                    |
|----------------------|----------------------------------|--------------------------------------|-------------------------------|-------------------------------------------|--------------------------------------|------------------------------------|
| Name:                | Sex:                             | Age:                                 |                               |                                           |                                      |                                    |
| Marital status:      | married <input type="radio"/>    | not married <input type="radio"/>    |                               |                                           |                                      |                                    |
| Education:           | illiterate <input type="radio"/> | read and write <input type="radio"/> | primary <input type="radio"/> | secondary/technical <input type="radio"/> | high <input type="radio"/>           |                                    |
| Occupation:          | housewife <input type="radio"/>  | not working <input type="radio"/>    | farmer <input type="radio"/>  | unskilled worker <input type="radio"/>    | skilled worker <input type="radio"/> | professional <input type="radio"/> |
| Residence:           | rural <input type="radio"/>      | urban <input type="radio"/>          |                               |                                           |                                      |                                    |
| Duration of disease: | Duration of dialysis:            |                                      |                               |                                           |                                      |                                    |

**I- patient satisfaction with medical staff-patient interaction in hemodialysis unit:**

| Items                                                                          | dissatisfied | neutral | satisfied | v. satisfied |
|--------------------------------------------------------------------------------|--------------|---------|-----------|--------------|
| 1. The way medical staff welcome you to the renal unit.                        |              |         |           |              |
| 2. Nurses' attitude as they tend to you.                                       |              |         |           |              |
| 3. Medical staff explanation for long waiting time and delays.                 |              |         |           |              |
| 4. Medical staff explanation of nature of treatment and possible side effects. |              |         |           |              |
| 5. The way medical staff handle complaints regarding medical services.         |              |         |           |              |

**II- patient satisfaction and perception of care during dialysis session:**

| Items                                                                                                             | dissatisfied | neutral | satisfied | v. satisfied |
|-------------------------------------------------------------------------------------------------------------------|--------------|---------|-----------|--------------|
| 1. Monitoring of dialysis by nurses regarding response to alarms and patient needs.                               |              |         |           |              |
| 2. Response of medical staff during technical hitch.                                                              |              |         |           |              |
| 3. Administration of medications during dialysis session.                                                         |              |         |           |              |
| 4. Nurses' enquiry to physicians for corrective changes in care if results of kidney function tests are abnormal. |              |         |           |              |
| 5. Response of enquired physicians if a problem aroused during session.                                           |              |         |           |              |
| 6. The way catheter sites and wounds are dressed.                                                                 |              |         |           |              |

**III- patient satisfaction and perception of care before and after dialysis session:**

| Items                                                                                       | dissatisfied | neutral | satisfied | V. satisfied |
|---------------------------------------------------------------------------------------------|--------------|---------|-----------|--------------|
| 1. Physical examination prior to dialysis.                                                  |              |         |           |              |
| 2. Nurses' observations prior to dialysis.                                                  |              |         |           |              |
| 3. Taking history for previous dialysis and history of current water and dietary intake.    |              |         |           |              |
| 4. Nurses' observations post dialysis prior to administration of post dialysis medications. |              |         |           |              |
| 5. Medical staff counseling after reviewing post dialysis results.                          |              |         |           |              |

**Observation checklist from patient perspective:**

**(A) Regarding health-care staff:**

| <b>Questions</b>                                                                                         | <b>yes</b> | <b>no</b> |
|----------------------------------------------------------------------------------------------------------|------------|-----------|
| 1. Are there enough nephrologists available for treatment and prescription?                              |            |           |
| 2. Is nurse-patient ratio adequate?                                                                      |            |           |
| 3. Are there enough biomedical technologists for repair and disinfection of dialysis machines?           |            |           |
| 4. Are lab technologists available to facilitate kidney function tests and other relevant investigation? |            |           |
| 5. Are there nutritionists available for dietary counseling?                                             |            |           |
| 6. Are there supportive staff to aid in environmental cleanup?                                           |            |           |

**(B) regarding equipment:**

| <b>questions</b>                                                                                                     | <b>yes</b> | <b>no</b> |
|----------------------------------------------------------------------------------------------------------------------|------------|-----------|
| 1. Are there enough dialysis machines?                                                                               |            |           |
| 2. Are the dysfunctional dialysis machines repaired in time?                                                         |            |           |
| 3. Are there enough dialysis items in the item store( blood lines – bicarb. Solution) ?                              |            |           |
| 4. Are miscellaneous items always available to facilitate dialysis( dressing packs – gauzes – disinfectant lotions)? |            |           |
